# Supplementary material for: Amentoflavone inhibits tumor necrosis factor-α-induced migration and invasion through AKT/mTOR/S6k1/hedgehog signaling in human breast cancer
Source: Royal Society of Chemistry journal article supplement (doi:10.1039/d1fo01085a), 2021-01-01
Supplement: d1fo01085a1.pdf [file d1fo01085a1.pdf]

**A**

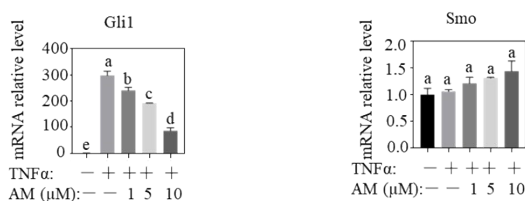

**B**

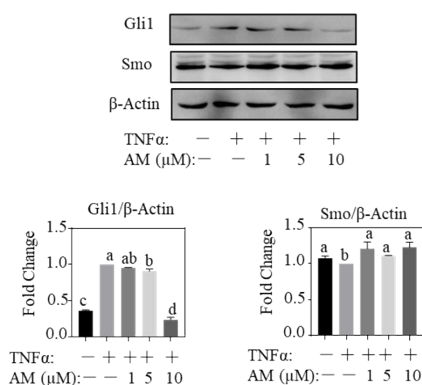

1

2 **Supplementary Figure 1.** Amentoflavone suppressed non-canonical Hedgehog signaling in  
3 TNFα-induced MDA-MB-231 human breast cancer cells. Cells ( $8 \times 10^5$  cells/ 6 cm dish) were  
4 treated with TNFα (10 ng/mL) alone or together with amentoflavone (1, 5, 10 μM) for 12 or  
5 24 h. The mRNA (A) and protein level (B) of Gli1 and Smo were determined by RT-PCR and  
6 western blot which normalized with Gapdh and β-Actin respectively. The lower-case letters  
7 a-e indicate statistically significant differences with  $p < 0.05$ , evaluated by one-way ANOVA  
8 followed by Duncan's test.

9

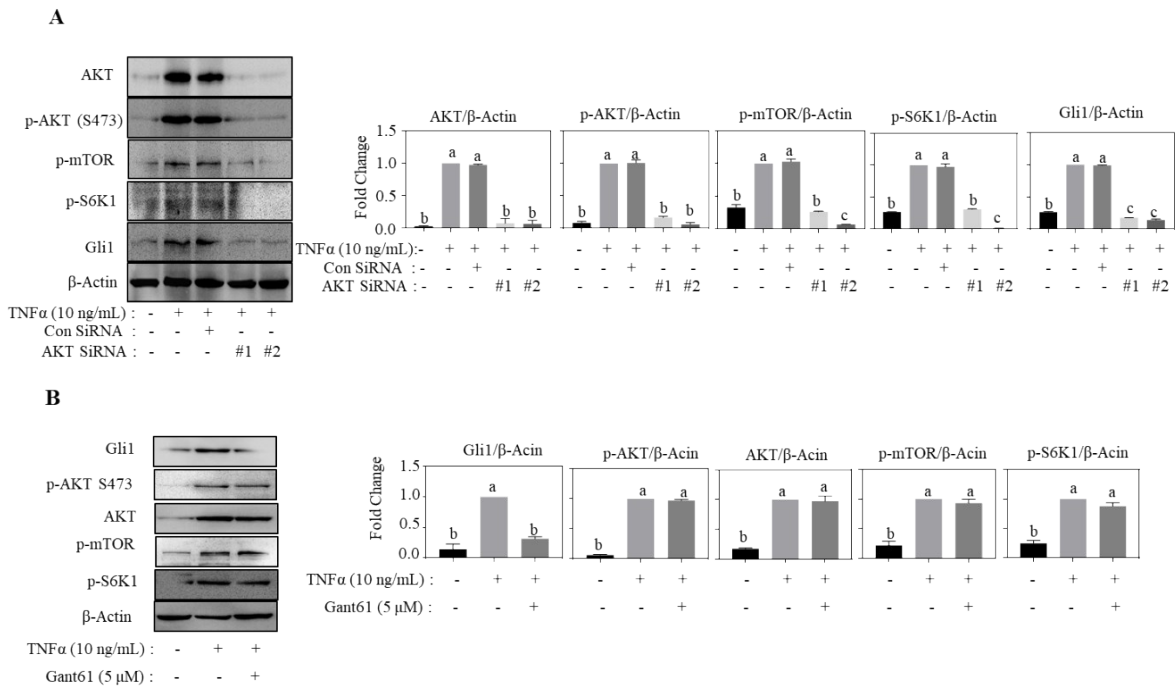

10

11 **Supplementary Figure 2.** Amentoflavone may suppressed migration and invasion in TNF $\alpha$ -  
 12 induced MDA-MB-231 via AKT/mTOR/S6K1/Gli1 axis. **A**, Cells ( $5 \times 10^5$  cells/ 6 cm dish)  
 13 were treated with TNF $\alpha$  (10 ng/mL) alone or with AKT siRNA (20 nM) for 48 h. **B**, Cells ( $8 \times$   
 14  $10^5$  cells/ 6 cm dish) were treated with TNF $\alpha$  (10 ng/mL) alone or with Gant61 (5  $\mu$ M) for 48  
 15 h. The protein levels of AKT, p-AKT (S473), p-mTOR, p-S6K1 and Gli1 were confirmed by  
 16 western blot and normalized with  $\beta$ -Actin. The lower-case letters a-c indicate statistically  
 17 significant differences with  $p < 0.05$ , evaluated by one-way ANOVA followed by Duncan's  
 18 test.

19

20
